# Supplementary material for: Screening Digitaria eriantha cv. Suvernola Endophytic Bacteria for Maize Growth Promotion
Source: MDPI journal article supplement (doi:10.3390/plants12142589), 2023-07-08
Supplement: s1 [file s1]

**Supplementary table S1.** *In vitro* growth promotion evaluation. BNF – growth in N free media. IAA – IAA synthesis. SI – calcium phosphate solubilization index. Siderophore – siderophore synthesis.

| Strain | Genus                       | BNF | IAA                   | SI   | Siderophore |
|--------|-----------------------------|-----|-----------------------|------|-------------|
|        |                             |     | $\mu\text{g mL}^{-1}$ |      | %           |
| 5038   |                             | -   | 95.94                 | -    | 28.60       |
| 5068   | <i>Enterobacter</i> sp.     | -   | 19.72                 | 1.60 | 10.70       |
| 5095   | <i>Enterobacter</i> sp.     | -   | 95.03                 | 3.11 | 62.78       |
| 5117   | <i>Rhizobium</i> sp.        | +   | 110.77                | 2.49 | 20.16       |
| 5120   | <i>Stenotrophomonas</i> sp. | +   | 89.53                 | -    | 39.08       |
| 5132   | <i>Stenotrophomonas</i> sp. | -   | 25.77                 | -    | -           |
| 5155   | <i>Rhizobium</i> sp.        | +   | 206.51                | -    | 17.55       |
| 5167   |                             | -   | 33.50                 | -    | 16.39       |
| 5170   | <i>Burkholderia</i> sp.     | +   | 32.97                 | -    | 50.35       |
| 5173   | <i>Variovorax</i> sp.       | +   | 20.18                 | -    | 5.35        |
| 5177   | <i>Agrobacterium</i> sp.    | +   | 123.91                | -    | 20.38       |
| 5183   | <i>Rhizobium</i> sp.        | +   | 118.09                | -    | 22.06       |
| 5193   | <i>Pseudomonas</i> sp.      | +   | 22.92                 | -    | -           |
| 5195   |                             | -   | 7.27                  | 1.90 | 3.06        |
| 5200   | <i>Stenotrophomonas</i> sp. | -   | 16.92                 | -    | 48.61       |
| 5211   | <i>Stenotrophomonas</i> sp. | -   | 38.14                 | DNG  | 25.51       |
| 5223   | <i>Stenotrophomonas</i> sp. | -   | 76.56                 | -    | -           |
| 5225   | <i>Stenotrophomonas</i> sp. | -   | 49.53                 | DNG  | 14.59       |
| 5226   | <i>Stenotrophomonas</i> sp. | -   | 44.08                 | DNG  | 17.68       |
| 5227   | <i>Pseudomonas</i> sp.      | -   | 50.49                 | -    | 9.28        |
| 5276   | <i>Rhizobium</i> sp.        | +   | 205.50                | -    | -           |
| 5287   | <i>Stenotrophomonas</i> sp. | -   | 139.53                | -    | 6.37        |
| 5289   |                             | -   | 9.09                  | -    | 50.00       |
| 5290   | <i>Pseudomonas</i> sp.      | -   | 41.34                 | DNG  | 27.22       |
| 5297   |                             | -   | 103.71                | -    | 58.06       |
| 5302   | <i>Stenotrophomonas</i> sp. | -   | 13.68                 | -    | -           |
| 5305   | <i>Pseudomonas</i> sp.      | +   | 69.84                 | -    | 29.71       |
| 5310   | <i>Pantoea</i> sp.          | +   | 115.69                | 1.71 | 24.36       |
| 5333   |                             | +   | 101.73                | -    | 20.20       |
| 5347   | <i>Stenotrophomonas</i> sp. | -   | 43.57                 | DNG  | 26.22       |
| 5396   | <i>Stenotrophomonas</i> sp. | +   | 58.14                 | DNG  | 26.13       |
| 5410   | <i>Rhizobium</i> sp.        | +   | 139.47                | -    | 24.36       |
| 121A   |                             | -   | 94.13                 | 1.10 | 23.17       |
| 121B1  | <i>Ochrobactrum</i> sp.     | -   | 12.80                 | -    | -           |

|        |                             |   |        |      |       |
|--------|-----------------------------|---|--------|------|-------|
| 14C    | <i>Variovorax</i> sp.       | + | 20.97  | -    | 35.94 |
| 168A3  | <i>Pantoea</i> sp.          | + | 117.89 | -    | 20.95 |
| 188B   |                             | - | 10.14  | -    | -     |
| 18C    | <i>Rhizobium</i> sp.        | + | 121.99 | -    | 25.69 |
| 18C2   | <i>Rhizobium</i> sp.        | + | 122.32 | -    | 35.94 |
| 192C   | <i>Achromobacter</i> sp.    | - | 4.20   | 1.89 | 71.11 |
| 193A   | <i>Enterobacter</i> sp.     | - | 18.53  | -    | 2.22  |
| 195C1  | <i>Pseudomonas</i> sp.      | - | 11.75  | 1.63 | 6.11  |
| 198A   | <i>Rhizobium</i> sp.        | + | 120.69 | -    | 20.42 |
| 199B2  | <i>Ochrobactrum</i> sp.     | - | 102.38 | 1.69 | 28.34 |
| 20A2   | <i>Stenotrophomonas</i> sp. | + | 58.09  | -    | 25.55 |
| 212B2  | <i>Rhizobium</i> sp.        | - | 119.36 | -    | 20.78 |
| 219B   | <i>Rhizobium</i> sp.        | - | 94.43  | -    | -     |
| 225B   | <i>Rhizobium</i> sp.        | - | 98.67  | DNG  | 31.74 |
| 230A   | <i>Rhizobium</i> sp.        | + | 133.45 | -    | 18.66 |
| 231B1  | <i>Priestia</i> sp.         | - | 24.39  | -    | 25.15 |
| 252A   | <i>Pantoea</i> sp.          | - | 90.77  | 1.71 | 17.22 |
| 258A2B | <i>Enterobacter</i> sp.     | + | 104.73 | -    | 19.81 |
| 270B   |                             | - | 110.84 | -    | -     |
| 270C   |                             | + | 109.65 | 1.24 | -     |
| 288A1A | <i>Enterobacter</i> sp.     | + | 114.61 | -    | 48.54 |
| 288C   | <i>Enterobacter</i> sp.     | - | 45.97  | 1.44 | -     |
| 289A   |                             | - | 8.04   | 1.74 | 31.39 |
| 294B   | <i>Curtobacterium</i> sp.   | - | 9.09   | -    | 25.11 |
| 297A   | <i>Pseudomonas</i> sp.      | - | 20.42  | -    | 14.46 |
| 303A2  | <i>Agrobacterium</i> sp.    | - | 159.13 | DNG  | 8.75  |
| 328A   | <i>Rhizobium</i> sp.        | + | 118.20 | -    | 16.49 |
| 331A2  | <i>Stenotrophomonas</i> sp. | + | 23.79  | -    | -     |
| 331C   | <i>Rhizobium</i> sp.        | - | 9.53   | -    | -     |
| 333A   | <i>Pantoea</i> sp.          | + | 123.68 | 1.84 | 17.29 |
| 333B   | <i>Pantoea</i> sp.          | + | 103.77 | 2.04 | 26.22 |
| 334C1  | <i>Pantoea</i> sp.          | - | 80.42  | 1.70 | 6.67  |
| 335B2  | <i>Rhizobium</i> sp.        | + | 120.55 | -    | 23.65 |
| 335C   | <i>Rhizobium</i> sp.        | + | 53.08  | 2.32 | -     |
| 336A   | <i>Rhizobium</i> sp.        | + | 126.87 | -    | 24.93 |
| 338A   | <i>Rhizobium</i> sp.        | - | 14.03  | -    | -     |
| 33D    | <i>Rhizobium</i> sp.        | - | 38.17  | -    | 21.31 |
| 344B   | <i>Rhizobium</i> sp.        | - | 19.91  | 1.55 | 13.48 |
| 346A2  | <i>Pantoea</i> sp.          | + | 106.17 | 2.03 | 28.96 |
| 347E   | <i>Stenotrophomonas</i> sp. | + | 44.16  | 1.58 | 7.96  |
| 360B   | <i>Rhizobium</i> sp.        | - | 38.14  | -    | 1.19  |

|        |                             |   |        |      |       |
|--------|-----------------------------|---|--------|------|-------|
| 363B   | <i>Stenotrophomonas</i> sp. | - | 25.12  | -    | 18.04 |
| 36D    | <i>Stenotrophomonas</i> sp. | - | 105.63 | -    | -     |
| 374B   | <i>Pantoea</i> sp.          | - | 12.80  | 1.80 | 82.78 |
| 376A   | <i>Stenotrophomonas</i> sp. | - | 16.57  | 1.93 | 25.00 |
| 377D   | <i>Pantoea</i> sp.          | - | 40.28  | 2.02 | -     |
| 387B2  | <i>Bacillus</i> sp.         | - | 21.93  | DNG  | 38.95 |
| 389B   | <i>Pantoea</i> sp.          | - | 56.57  | 1.26 | 19.44 |
| 394D   | <i>Rhizobium</i> sp.        | + | 120.38 | -    | 25.15 |
| 396A   | <i>Paenibacillus</i> sp.    | - | 68.37  | -    | 15.47 |
| 396B   |                             | - | 67.95  | 1.42 | 26.53 |
| 399B   | <i>Pantoea</i> sp.          | + | 100.06 | 1.85 | 20.07 |
| 39B    | <i>Enterobacter</i> sp.     | + | 126.31 | 2.02 | 20.29 |
| 400B   | <i>Pantoea</i> sp.          | - | 17.06  | 1.50 | -     |
| 402B   |                             | + | 19.25  | 1.38 | 6.45  |
| 403B   | <i>Rhizobium</i> sp.        | - | 99.79  | -    | 6.11  |
| 410B   |                             | + | 90.63  | -    | 14.37 |
| 413D2  | <i>Ochrobactrum</i> sp.     | - | 124.16 | 2.86 | 13.09 |
| 415A   | <i>Pantoea</i> sp.          | + | 95.32  | 1.27 | 16.27 |
| 416A   | <i>Pantoea</i> sp.          | - | 99.23  | 1.15 | -     |
| 41C    | <i>Enterobacter</i> sp.     | + | 106.39 | 1.54 | 19.23 |
| 425B   | <i>Rhizobium</i> sp.        | - | 212.05 | 2.13 | 17.77 |
| 432D   | <i>Stenotrophomonas</i> sp. | - | 46.03  | DNG  | 14.06 |
| 5038A  | <i>Pantoea</i> sp.          | - | 27.13  | -    | 32.27 |
| 5057A  | <i>Shinella</i> sp.         | - | 81.47  | -    | 1.59  |
| 5333A  | <i>Achromobacter</i> sp.    | + | 13.57  | -    | 21.40 |
| 5358A  | <i>Paenibacillus</i> sp.    | + | 31.05  | -    | 6.06  |
| 5378EB | <i>Pseudomonas</i> sp.      | - | 31.26  | -    | 61.11 |
| 5379A  | <i>Stenotrophomonas</i> sp. | - | 93.99  | 1.40 | 22.22 |
| G20    | <i>Enterobacter</i> sp.     | + | 154.44 | 2.84 | 47.48 |
| G37B1  | <i>Pseudomonas</i> sp.      | + | 53.45  | -    | 13.79 |
| N12A   | <i>Pantoea</i> sp.          | + | 111.48 | 2.17 | 23.47 |
| N13A   | <i>Pantoea</i> sp.          | + | 16.70  | -    | 25.33 |
| N14D   | <i>Pseudomonas</i> sp.      | + | 43.94  | -    | 33.91 |
| N15B1  | <i>Pseudomonas</i> sp.      | + | 81.19  | 1.48 | 18.70 |
| N15D   | <i>Herbaspirillum</i> sp.   | + | 28.40  | -    | 14.01 |
| N16B   | <i>Rhizobium</i> sp.        | - | 128.96 | -    | 34.04 |
| N18A   | <i>Pseudomonas</i> sp.      | - | 35.43  | DNG  | 14.06 |
| N18E   |                             | - | 19.73  | -    | 27.37 |
| N1C    | <i>Variovorax</i> sp.       | + | 36.17  | -    | 22.46 |
| N21F   | <i>Stenotrophomonas</i> sp. | + | 61.42  | -    | 15.65 |
| N22B   | <i>Pseudomonas</i> sp.      | + | 38.37  | -    | 10.65 |

|       |                             |   |        |      |       |
|-------|-----------------------------|---|--------|------|-------|
| N23B  | <i>Pantoea</i> sp.          | + | 170.58 | 1.91 | 31.79 |
| N27B  | <i>Stenotrophomonas</i> sp. | - | 30.52  | -    | 22.15 |
| N27D  | <i>Pseudomonas</i> sp.      | + | 68.99  | -    | 10.48 |
| N28D  | <i>Pseudomonas</i> sp.      | + | 117.04 | -    | 13.93 |
| N2C   | <i>Variovorax</i> sp.       | + | 19.44  | 2.04 | 39.61 |
| N31C  | <i>Pseudomonas</i> sp.      | + | 85.55  | 1.59 | 10.61 |
| N37C  |                             | + | 66.99  | 2.48 | 19.14 |
| N3C   | <i>Rhizobium</i> sp.        | - | 27.35  | 1.69 | 24.89 |
| N40E  |                             | + | 103.06 | 3.10 | 37.62 |
| N41A  | <i>Kosakonia</i> sp.        | + | 67.58  | -    | 15.08 |
| N42A  | <i>Agrobacterium</i> sp.    | - | 206.46 | -    | 21.84 |
| N44B2 | <i>Stenotrophomonas</i> sp. | + | 101.93 | -    | 18.30 |
| N44E  | <i>Achromobacter</i> sp.    | + | 116.68 | -    | 5.04  |
| N46D  | <i>Serratia</i> sp.         | + | 115.06 | -    | 31.21 |
| N5G   | <i>Burkholderia</i> sp.     | - | 22.27  | 1.49 | 30.37 |
| N9B   | <i>Burkholderia</i> sp.     | - | 21.34  | 2.35 | 65.34 |

---

Dng = did not grow
