# Supplementary material for: Screening Digitaria eriantha cv. Suvernola Endophytic Bacteria for Maize Growth Promotion
Source: MDPI journal article supplement (doi:10.3390/plants12142589), 2023-07-08
Supplement: s1 [file s1]

**Supplementary table S2.** Endophytic Pangolão grass bacteria effects on maize under low soluble iron availability.

| Treatments   | PH<br>(cm) | CD<br>(mm) | LA<br>(cm <sup>2</sup> ) | SDM  | RDM                    | SAN | SAP  | RECI | REN | RE+C |
|--------------|------------|------------|--------------------------|------|------------------------|-----|------|------|-----|------|
|              |            |            |                          | (mg) | mg plant <sup>-1</sup> |     | %    |      |     |      |
| <b>121B1</b> | 71         | 5,7        | 90                       | 922  | 751                    | 93  | 10   | 63   | 72  | 85   |
| <b>192C</b>  | 74         | 5,5        | 94                       | 1380 | 851                    | 88  | 6    | 94   | 107 | 127  |
| <b>212B2</b> | 74         | 6,2        | 101                      | 1404 | 799                    | 91  | 7    | 95   | 109 | 129  |
| <b>231B1</b> | 69         | 6,5        | 84                       | 1263 | 927                    | 82  | 9    | 86   | 98  | 116  |
| <b>252A</b>  | 85*        | 6,8        | 115                      | 1703 | 1322                   | 131 | 11   | 116  | 132 | 157  |
| <b>331C</b>  | 77         | 6,6        | 115                      | 1538 | 1217                   | 121 | 10   | 105  | 119 | 142  |
| <b>333B</b>  | 76         | 6,2        | 113                      | 1463 | 1080                   | 109 | 14   | 99   | 113 | 135  |
| <b>335C</b>  | 74         | 6          | 126                      | 1350 | 817                    | 101 | 8    | 92   | 105 | 124  |
| <b>338A</b>  | 56         | 5,1        | 127                      | 802  | 308                    | 69  | 7    | 55   | 62  | 74   |
| <b>344B</b>  | 76         | 6,2        | 116                      | 1300 | 864                    | 115 | 8    | 88   | 101 | 120  |
| <b>396B</b>  | 76         | 5,5        | 99                       | 1066 | 567                    | 87  | 13   | 72   | 83  | 98   |
| <b>413D2</b> | 79         | 6,3        | 137                      | 1719 | 878                    | 117 | 12   | 117  | 133 | 158  |
| <b>432D</b>  | 78         | 5,6        | 110                      | 1462 | 1067                   | 129 | 9    | 99   | 113 | 135  |
| <b>5038</b>  | 71         | 5,8        | 102                      | 1198 | 760                    | 103 | 7    | 81   | 93  | 110  |
| <b>5057A</b> | 70         | 6,2        | 121                      | 1228 | 696                    | 98  | 8    | 83   | 95  | 113  |
| <b>5095</b>  | 78         | 6,5        | 107                      | 1420 | 790                    | 81  | 8    | 97   | 110 | 131  |
| <b>5211</b>  | 78         | 5,9        | 115                      | 1130 | 728                    | 103 | 8    | 77   | 88  | 104  |
| <b>5227</b>  | 78         | 6,4        | 119                      | 1442 | 1512*                  | 82  | 8    | 98   | 112 | 133  |
| <b>5287</b>  | 68         | 5,4        | 109                      | 1310 | 985                    | 107 | 10   | 89   | 102 | 121  |
| <b>5297</b>  | 72         | 5,3        | 94                       | 1152 | 865                    | 103 | 7    | 78   | 89  | 106  |
| <b>5347</b>  | 68         | 6,7        | 120                      | 1314 | 689                    | 86  | 9    | 89   | 102 | 121  |
| <b>5358A</b> | 71         | 5,8        | 104                      | 1080 | 840                    | 86  | 7    | 73   | 84  | 100  |
| <b>5410</b>  | 69         | 5,9        | 110                      | 1336 | 900                    | 81  | 6    | 91   | 104 | 123  |
| <b>+C</b>    | 56         | 5,3        | 93                       | 1221 | 729                    | 70  | 6    | 83   | 95  | 113  |
| <b>N9B</b>   | 72         | 5,7        | 104                      | 1113 | 775                    | 95  | 7    | 76   | 86  | 103  |
| <b>NI</b>    | 70         | 6,2        | 112                      | 1208 | 683                    | 115 | 8    | 82   | 94  | 111  |
| <b>CI</b>    | 69         | 6,4        | 112                      | 1133 | 738                    | 89  | 8    | 77   | 88  | 104  |
| <b>VC</b>    | 1,5        | 6,2        | 2,4                      | 2,3  | 3,4                    | 5,9 | 11,5 | 3,7  | 3,6 | 3,5  |

NI = No inoculation; CI = Commercial inoculant; +C = high-solubility Fe source; PH = plant height; CD= colm diameter; LA= leaf area; SDM = shoot dry mass; RDM = dry mass of the root system; SAN = accumulation of N in aerial part; SAP = accumulation of P in the aerial part; RER = efficiency relative to the commercial inoculant; REN = non-inoculated control relative efficiency; RE+C = relative efficiency positive control. VC = coefficient of variation. All data were transformed by log10. Means followed by an asterisk differ significantly from the commercial inoculant control at 0.05 probability, by Dunnet's test.
